# Supplementary material for: Money Affects Theory of Mind Differently by Gender
Source: PLOS journal article supplement (doi:10.1371/journal.pone.0143973), 2015-12-03
Supplement: S1 (10.1371/journal.pone.0143973.s001) [file journal.pone.0143973.s001]

# Appendix: Money Affects Theory of Mind Differently by Gender\*

Garret Ridinger<sup>1</sup> and Michael McBride<sup>1,+</sup>

<sup>1</sup>**Affiliations:** Experimental Social Science Laboratory, Department of Economics, University of California, Irvine, CA, 92697-5100

<sup>+</sup>Correspondence to: mcbride@uci.edu

## 1 Introduction

We here provide additional details of the results presented in the main article. We first describe the experimental design and show screenshots of the instructions viewed by a typical subject in each condition. Next we present descriptive statistics and hypothesis tests of the experiment data. Finally, we present additional regression analysis and robustness checks of our results.

## 2 Experimental Design

Each subject participated in one of four experimental conditions. At the start of the experiment, subjects viewed instructions and then completed the Reading the Mind in the

---

\***Acknowledgments:** Data are available from the authors upon request. Financial support for this study was provided by Army Research Office Award No. W911NF-11-1-0332 and Air Force Office of Scientific Research Award No. FA9550-10-1-0569. We are grateful to colleagues for their comments and suggestions, and to the Experimental Social Science Laboratory for the use of its facilities.

Eyes Test (RMET) [12]. In the Baseline condition, subjects viewed the standard instructions for the RMET and received no monetary payment based on their RMET performance. In the Individual condition, the instructions were the same as the Baseline condition except that individuals receive \$0.40 for each correct selection in the RMET. In the Competition condition, subjects were randomly divided into groups of four. Subjects were told that the person in their group that preforms best would receive \$40 and all other subjects would receive \$0. In the Charity condition, prior to the RMET task, the subject is told that he or she would undertake a task for a charity of his or her choice, with the amount donated anonymously on the subject’s behalf to the charity based on his or her performance on the task. The subject is then given a list of four charities (Amnesty International, UNICEF, Doctors without Borders, and American Cancer Society), provided with a paragraph about that organization’s mission and a picture of an example of a beneficiary of that organization. The subject next selects which charity will receive the earnings, and then does the RMET with \$0.40 per correct question donated to their selected charity. At the end of the experiment subjects then completed a questionnaire that included demographic questions and the Cognitive Reflection Test [66].

### 3 Experiment Screenshots

The experiment was programmed and conducted with the software z-Tree [79]. The following screenshots present the instructions viewed by a given subject in the experiment. We present examples of the instructions for each condition. All instructions were delivered to subjects via their computer screen.

Instructions

**Please read the following instructions:**

Welcome and thank you for participating in this experiment.

You will be paid for this experiment in the following two ways:

- (1) You will be paid \$7 for showing up to this experiment
- (2) You will earn money throughout the experiment based on your choices.

Please turn off your cell phone and put away any electronic devices

The entire experiment will take place through the computer terminals. Please do not communicate with other participants in the study.

When you are finished with the page of instructions please press the "OK" button in the bottom right hand corner. Pressing this button will take you to the next set of instructions and you will not be able to return to the previous screen.

OK

Fig A: Experiment Instructions—Welcome Screen for all Conditions

Instructions

**Please read the following instructions:**

In part I of the experiment you will be asked to complete the following task.

For each set of eyes, choose which word best describes what the person in the picture is thinking or feeling.

You may feel that more than one word is applicable but you may only choose one word, the word which you consider to be most suitable.

Before making your choice, make sure that you have read all 4 words.

You will have 30 seconds to make your choice.

You should try to do the task as quickly as possible.

If you don't know what a word means you can look it up in the definition handout.

OK

Fig B: Experiment Instructions—Baseline Condition

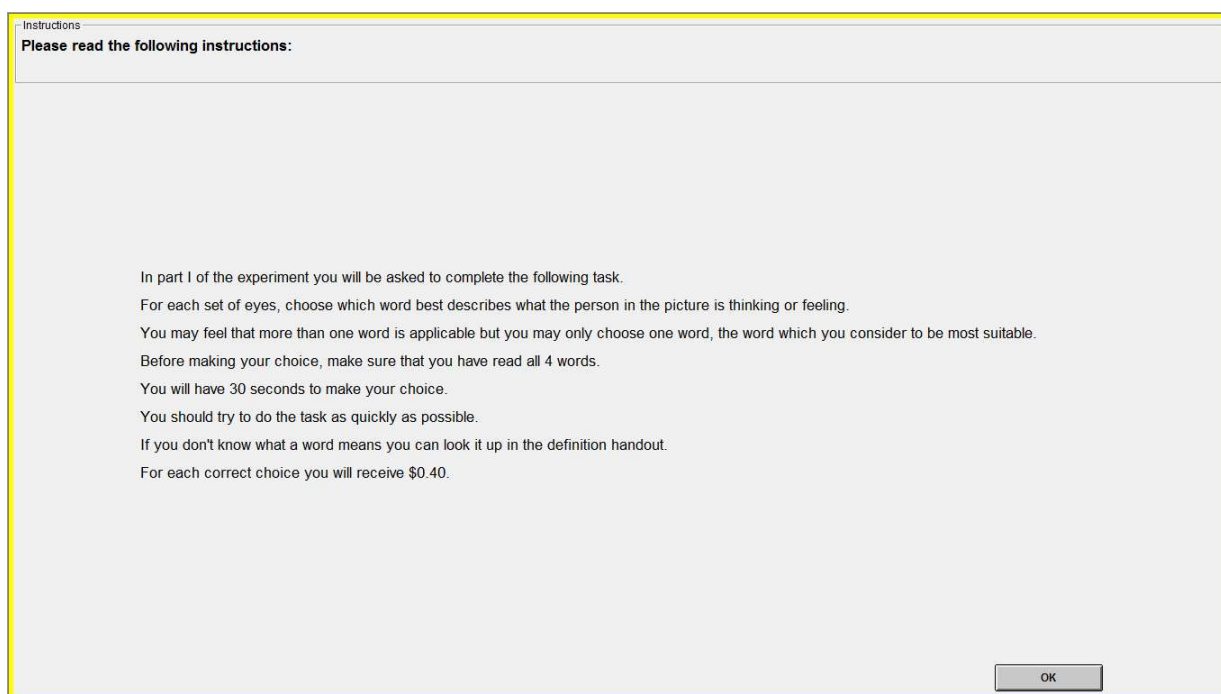

Fig C: Experiment Instructions—Individual Condition

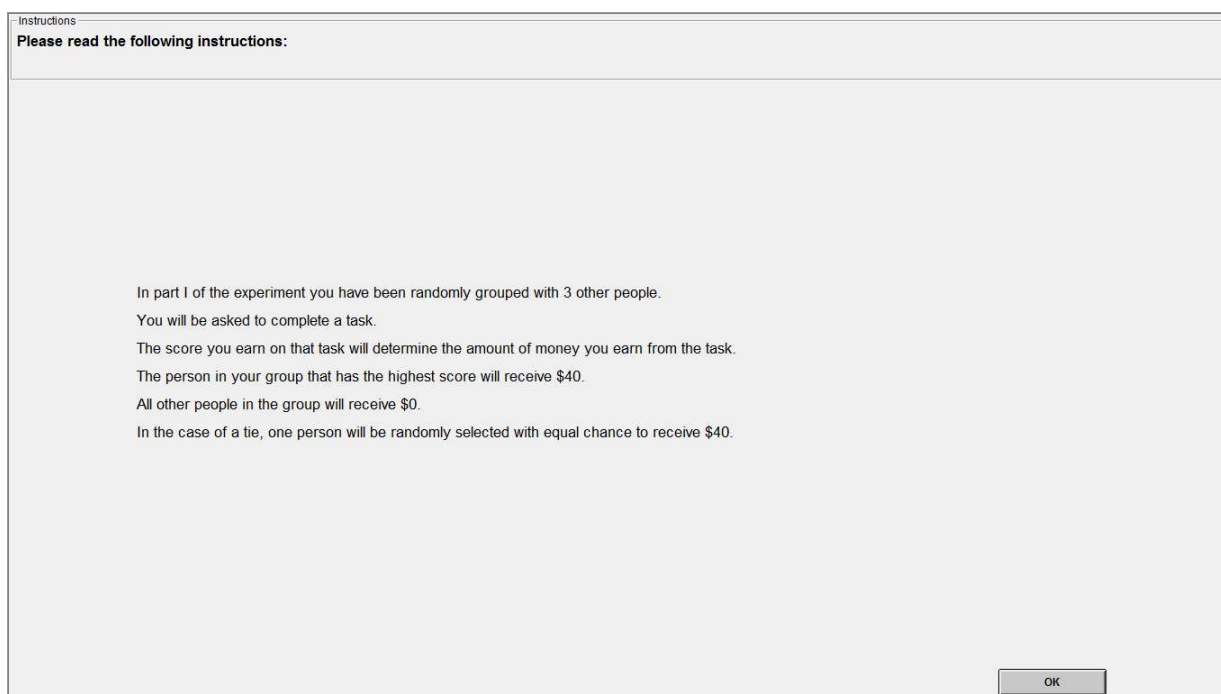

Fig D: Experiment Instructions—Winner-take-all Condition

Instructions

Please read the following instructions:

In part I of the experiment you will be asked to complete the following task.

For each set of eyes, choose which word best describes what the person in the picture is thinking or feeling.

You may feel that more than one word is applicable but you may only choose one word, the word which you consider to be most suitable.

Before making your choice, make sure that you have read all 4 words.

You will have 30 seconds to make your choice.

You should try to do the task as quickly as possible.

If you don't know what a word means you can look it up in the definition handout.

For each correct choice, one point will be added to your score.

The person in your group that has the highest score will receive \$40.

All other people in the group will receive \$0.

OK

Fig E: Experiment Instructions—Winner-take-all Condition, Continued

Instructions

Please read the following instructions:

In part I of the experiment you will be asked to complete a task for a charity.

The amount of money donated to the charity will be based on your performance in the task.

Prior to the start of the task, you will be asked to select one of four charities you would like the money to be donated to.

Please press OK to view descriptions of the four charities.

OK

Fig F: Experiment Instructions—Charity Condition

| Instructions                                                                                                                                                                                                                                                                                                                                                                                                                                                                                                                                                                                                                                                                                                                                                                                                                                                                                                                                                                         |                                                                                                                                                                                                                                                                                                                                                                                                                                                                                                                                                                                                   |
|--------------------------------------------------------------------------------------------------------------------------------------------------------------------------------------------------------------------------------------------------------------------------------------------------------------------------------------------------------------------------------------------------------------------------------------------------------------------------------------------------------------------------------------------------------------------------------------------------------------------------------------------------------------------------------------------------------------------------------------------------------------------------------------------------------------------------------------------------------------------------------------------------------------------------------------------------------------------------------------|---------------------------------------------------------------------------------------------------------------------------------------------------------------------------------------------------------------------------------------------------------------------------------------------------------------------------------------------------------------------------------------------------------------------------------------------------------------------------------------------------------------------------------------------------------------------------------------------------|
| Please read the following instructions:                                                                                                                                                                                                                                                                                                                                                                                                                                                                                                                                                                                                                                                                                                                                                                                                                                                                                                                                              |                                                                                                                                                                                                                                                                                                                                                                                                                                                                                                                                                                                                   |
| <div>Amnesty International logo here</div> <p>Amnesty International is a non-profit organization that conducts research and generates action to prevent and end grave abuses of human rights, and to demand justice for those whose rights have been violated. Through its international programs, Amnesty gathers and disseminates information on human rights. Amnesty supports the research into human rights violations and the coordination of international efforts to stop them. Its membership program assists in the development, training and support of local campus and country coordination groups working for Amnesty to advance human rights through publications and dissemination of information to members as well as the general public.</p> <p>Amnesty International members rally against the military crackdown of opposition protests and free speech in Thailand.</p> <div>Image of Thai protestors here, obtained from Amnesty International web site</div> | <div>UNICEF logo here</div> <p>The United Nations Children's Fund (UNICEF) is a United Nations Program that provides long-term humanitarian and developmental assistance to children and mothers in need. UNICEF distributes essential items including vaccines, antiretroviral medicines for HIV, nutritional supplements, emergency shelters, and educational supplies to children and mothers in developing countries.</p> <p>A UNICEF ambassador helps implement child welfare programs in China.</p> <div>Image of UNICEF ambassador helping child here, obtained from UNICEF web site</div> |
| OK                                                                                                                                                                                                                                                                                                                                                                                                                                                                                                                                                                                                                                                                                                                                                                                                                                                                                                                                                                                   |                                                                                                                                                                                                                                                                                                                                                                                                                                                                                                                                                                                                   |

Fig G: Experiment Instructions—Charities I

| Instructions                                                                                                                                                                                                                                                                                                                                                                                                                                                                                                                                                                                                                                                                                                                                                                                                                                                                                                                                                           |                                                                                                                                                                                                                                                                                                                                                                                                                                                                                                                                                                                                                                                                                                                                                                                                                                                                                                                                                                                                                                                    |
|------------------------------------------------------------------------------------------------------------------------------------------------------------------------------------------------------------------------------------------------------------------------------------------------------------------------------------------------------------------------------------------------------------------------------------------------------------------------------------------------------------------------------------------------------------------------------------------------------------------------------------------------------------------------------------------------------------------------------------------------------------------------------------------------------------------------------------------------------------------------------------------------------------------------------------------------------------------------|----------------------------------------------------------------------------------------------------------------------------------------------------------------------------------------------------------------------------------------------------------------------------------------------------------------------------------------------------------------------------------------------------------------------------------------------------------------------------------------------------------------------------------------------------------------------------------------------------------------------------------------------------------------------------------------------------------------------------------------------------------------------------------------------------------------------------------------------------------------------------------------------------------------------------------------------------------------------------------------------------------------------------------------------------|
| Please read the following instructions:                                                                                                                                                                                                                                                                                                                                                                                                                                                                                                                                                                                                                                                                                                                                                                                                                                                                                                                                |                                                                                                                                                                                                                                                                                                                                                                                                                                                                                                                                                                                                                                                                                                                                                                                                                                                                                                                                                                                                                                                    |
| <div>UNICEF logo here</div> <p>Doctors Without Borders/Médecins Sans Frontières (MSF) is an organization that helps people worldwide where the need is greatest, delivering emergency medical aid to people affected by conflict, epidemics, disasters or exclusion from health care. In emergencies and their aftermath, Doctors Without Borders provides basic health care, rehabilitates and runs hospitals and clinics, performs surgery, battles epidemics, carries out vaccination campaigns, provides water, sanitation, and shelter support, runs nutritional programs, and offers mental health care. Through longer-term programs, Doctors Without Borders treats chronic diseases such as tuberculosis, malaria, sleeping sickness, and AIDS.</p> <p>A Doctor Without Borders volunteer treats refugees in South Sudan.</p> <div>Image of Doctor Without Borders treating patient in South Sudan here, obtained from Doctors Without Borders web site</div> | <div>American Cancer Society logo here</div> <p>The American Cancer Society is a nationwide, community-based, voluntary health organization dedicated to eliminating cancer as a major health problem by preventing cancer, saving lives, and diminishing suffering from cancer, through research, education, advocacy, and service. The American Cancer Society awards grants to academic institutions and professionals in the fields of medicine and science for investigations into the causes, prevention, and cure of cancer. Researchers at the American Cancer Society analyze trends in cancer occurrence, risk factors, screening, and oversee behavioral studies on areas such as family dynamics, minority issues, and communication between physicians and patients.</p> <p>Researchers funded by the American Cancer Society conduct a widescale study to understand potential causes and treatments of cancer.</p> <div>Image of researcher drawing blood from volunteer here, obtained from American Cancer Society web site</div> |
| OK                                                                                                                                                                                                                                                                                                                                                                                                                                                                                                                                                                                                                                                                                                                                                                                                                                                                                                                                                                     |                                                                                                                                                                                                                                                                                                                                                                                                                                                                                                                                                                                                                                                                                                                                                                                                                                                                                                                                                                                                                                                    |

Fig H: Experiment Instructions—Charities II

Instructions

Please read the following instructions:

The amount of money donated to the charity will be based on your performance in the task.

The total amount of money you earn in the task will be anonymously donated on your behalf by the experimenter.

Please select one of the four charities that you would like the money to be donated to.

☐ Amnesty International

☐ American Cancer Society

☐ Doctors Without Borders

☒ Unicef

OK

Fig I: Experiment Instructions—Charity Choice

Instructions

Please read the following instructions:

In part I of the experiment you will be asked to complete the following task.

For each set of eyes, choose which word best describes what the person in the picture is thinking or feeling.

You may feel that more than one word is applicable but you may only choose one word, the word which you consider to be most suitable.

Before making your choice, make sure that you have read all 4 words.

You will have 30 seconds to make your choice.

You should try to do the task as quickly as possible.

If you don't know what a word means you can look it up in the definition handout.

For each correct choice, \$0.40 will be donated to Unicef.

OK

Fig J: Experiment Instructions—Charity Condition, Continued

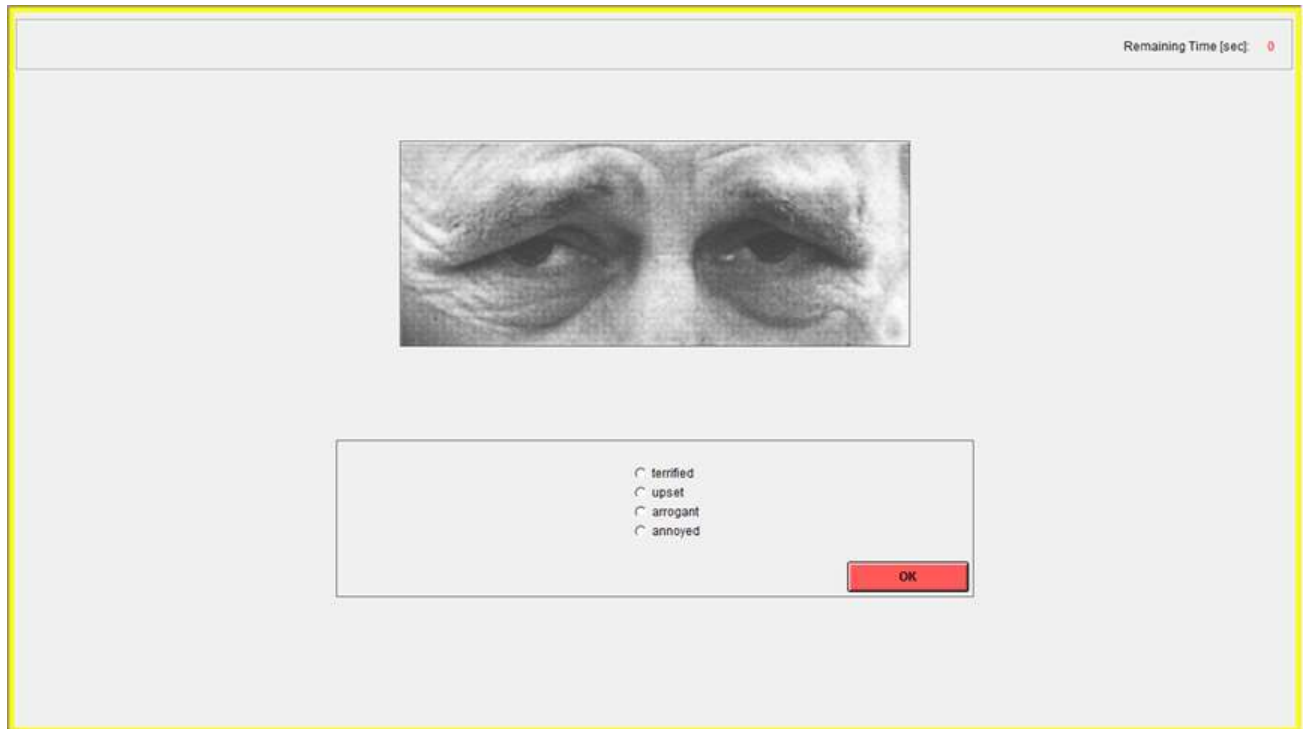

Fig K: Example of RMET Decision Screen

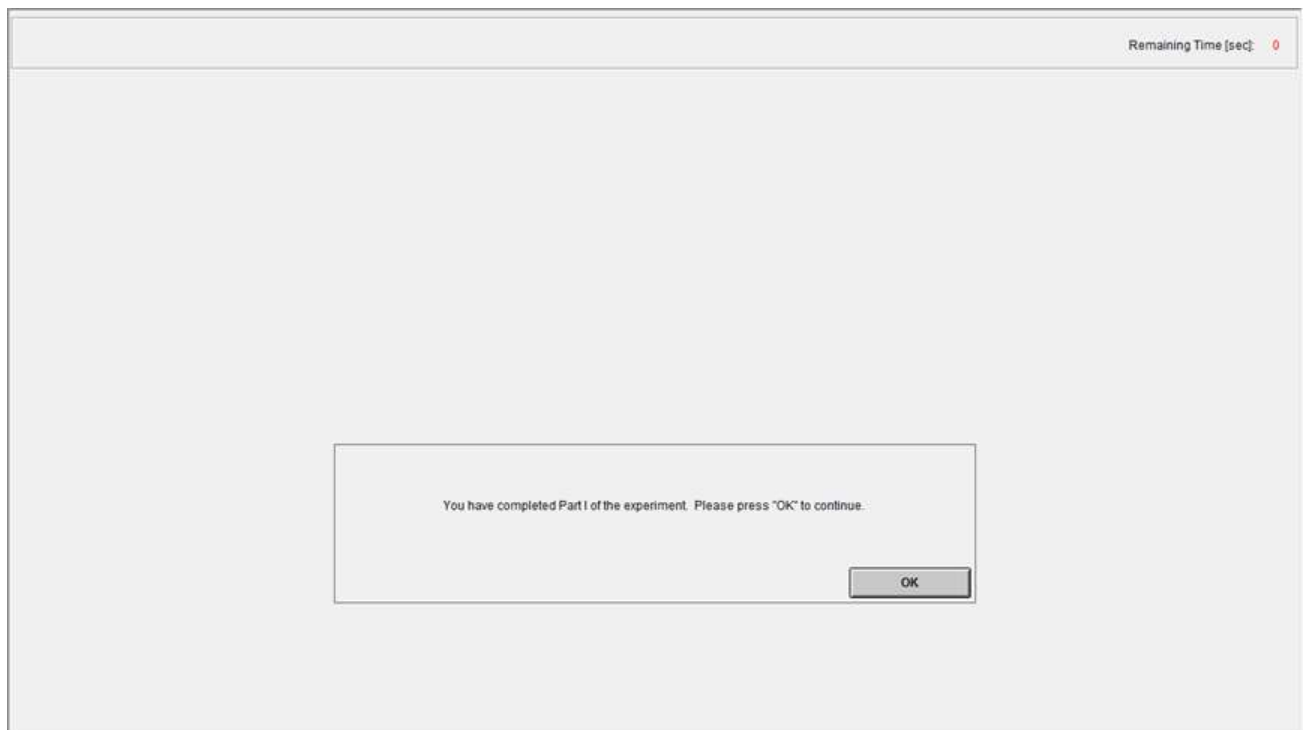

Fig L: Results Screen After Finishing RMET



## 4 Reading the Mind in the Eyes Test

In this section, we give detailed information on the Reading the Mind in the Eyes Test (RMET) given to subjects in the experiment. We use the revised version of the RMET [12] which consists of 36 pictures of the area around a person's eyes. Each subject was asked to select one of four words that best described what the person is thinking or feeling (for precise instructions please see Fig B, Fig C, Fig E, and Fig J above). In section 4.1, we present the questions from the RMET in the order displayed to the subjects. Each subject saw one picture and set of four words at a time. In section 4.2, we give screenshots of the word definition handouts that each subject received prior to the RMET task. Finally, in Section 4.3, we give the answer for each RMET question.

### 4.1 Questions

(Practice)

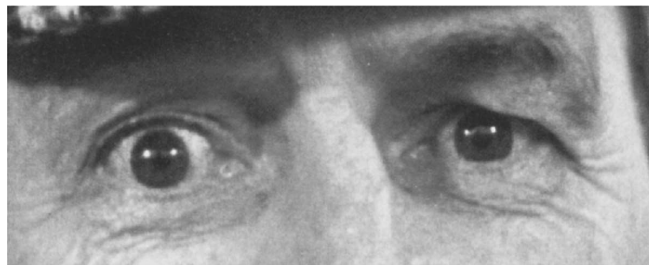

Jealous  
Panicked  
Arrogant  
Hateful

(1)

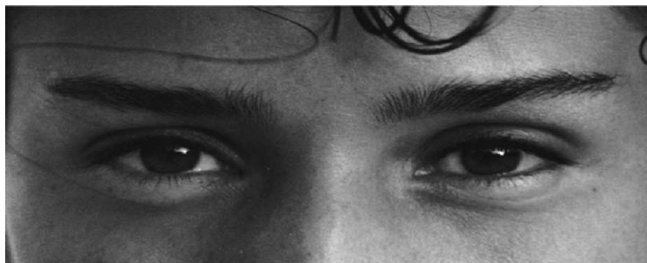

Playful  
Comforting  
Irritated  
Bored

(2)

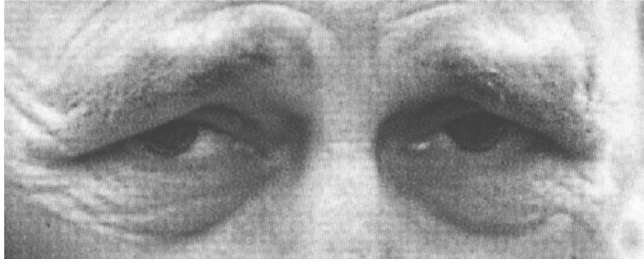

Terrified  
Upset  
Arrogant  
Annoyed

(3)

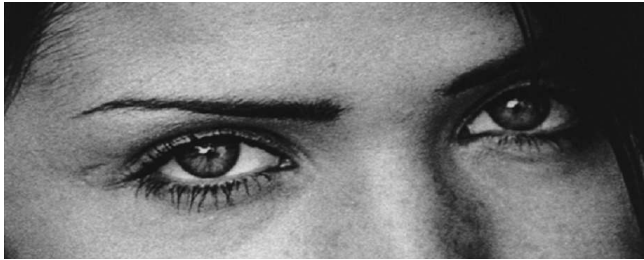

Joking  
Flustered  
Desire  
Convinced

(4)

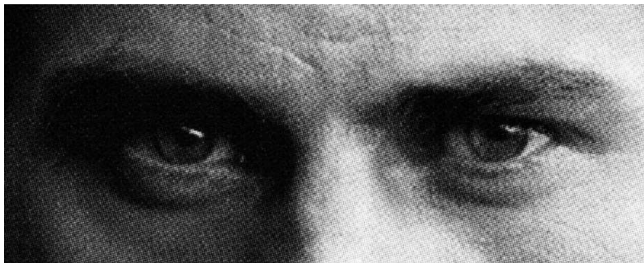

Joking  
Insisting  
Amused  
Relaxed

(5)

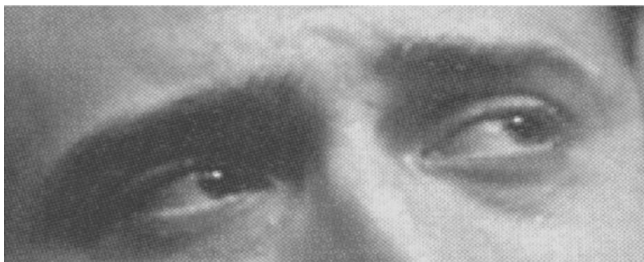

Irritated  
Sarcastic  
Worried  
Friendly

(6)

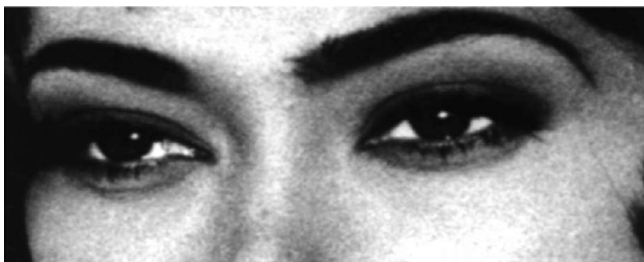

Aghast  
Fantasizing  
Impatient  
Alarmed

(7)

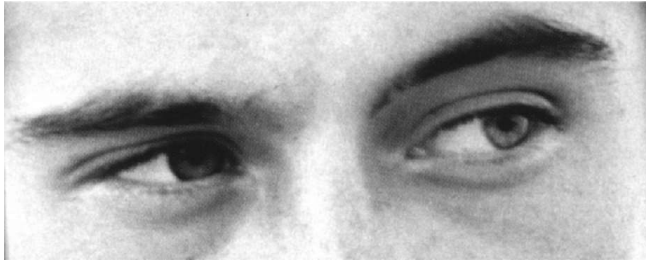

Apologetic  
Friendly  
Uneasy  
Dispirited

(8)

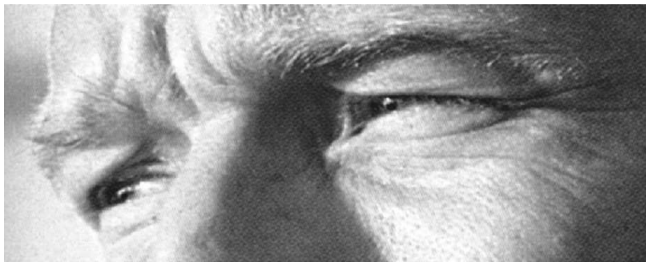

Despondent  
Relieved  
Shy  
Excited

(9)

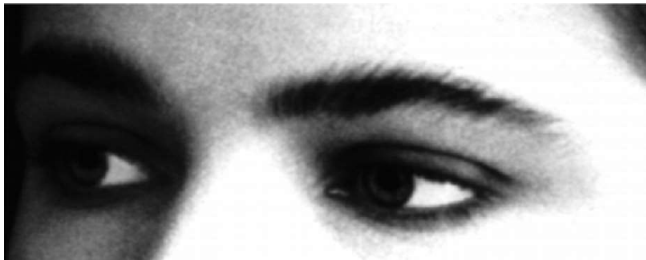

Annoyed  
Hostile  
Horrificed  
Preoccupied

(10)

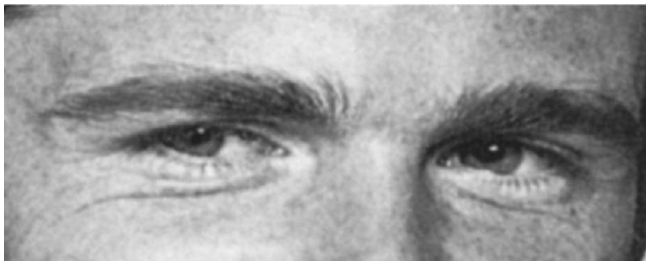

Cautious  
Insisting  
Bored  
Aghast

(11)

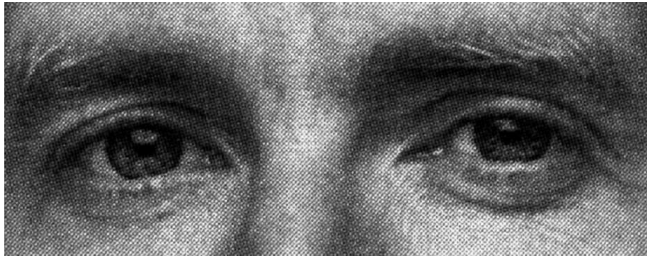

Terrified  
Amused  
Regretful  
Flirtatious

(12)

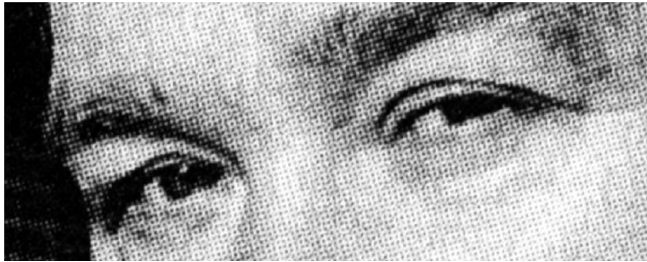

Indifferent  
Embarrassed  
Skeptical  
Dispirited

(13)

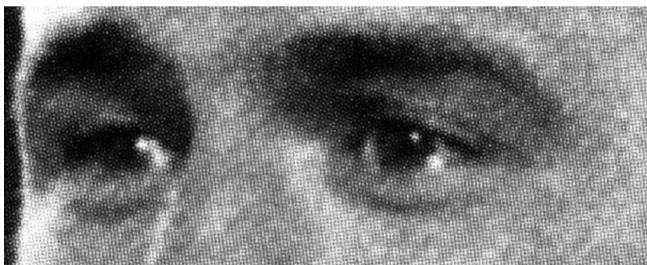

Decisive  
Anticipating  
Threatening  
Shy

(14)

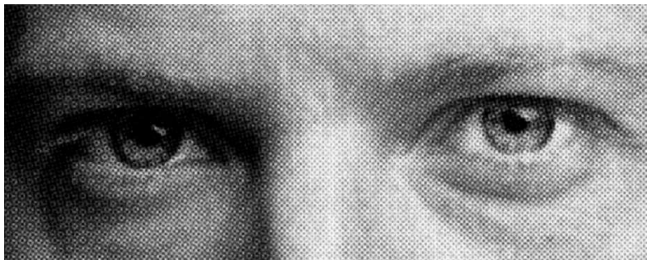

Irritated  
Disappointed  
Depressed  
Accusing

(15)

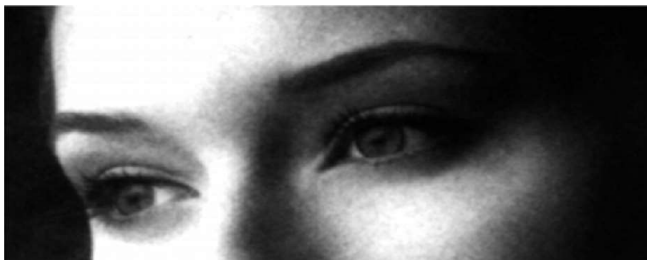

Contemplative  
Flustered  
Encouraging  
Amused

(16)

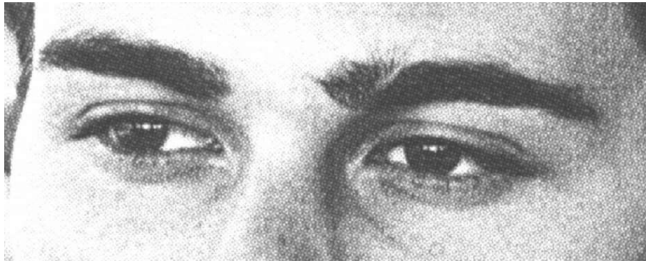

Irritated  
Thoughtful  
Encouraging  
Sympathetic

(17)

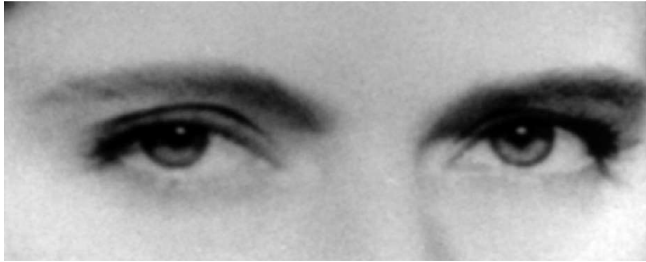

Doubtful  
Affectionate  
Playful  
Aghast

(18)

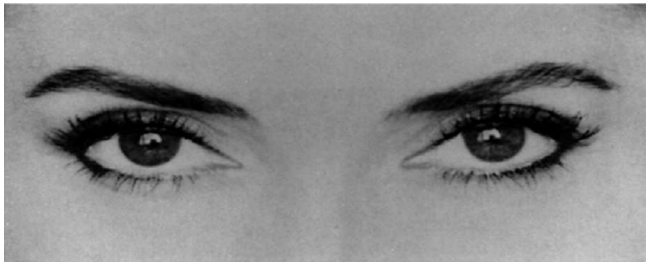

Decisive  
Amused  
Aghast  
Bored

(19)

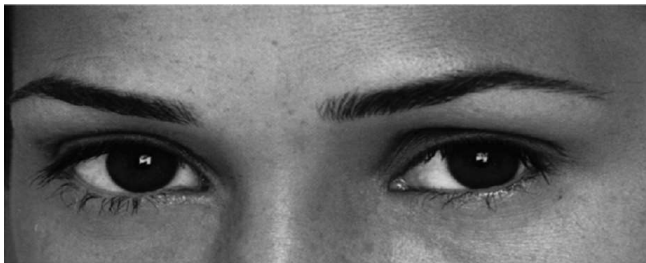

Arrogant  
Grateful  
Sarcastic  
Tentative

(20)

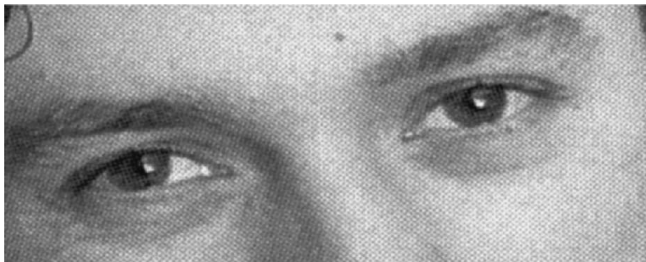

Dominant  
Friendly  
Guilty  
Horried

(21)

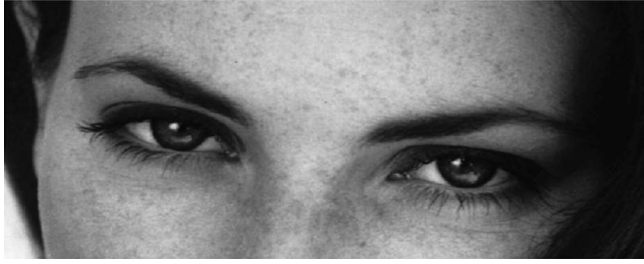

Embarrassed  
Fantasizing  
Confused  
Panicked

(22)

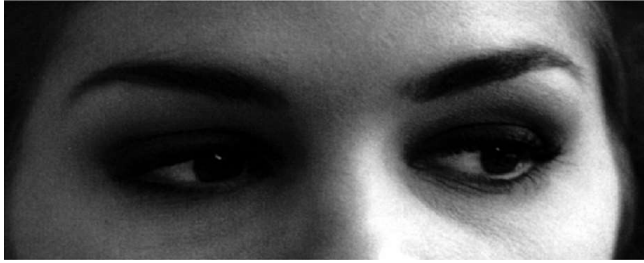

Preoccupied  
Grateful  
Insisting  
Imploring

(23)

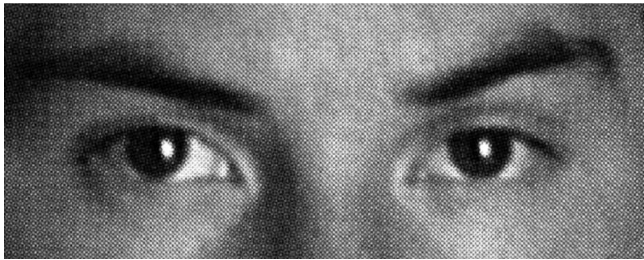

Contented  
Apologetic  
Defiant  
Curious

(24)

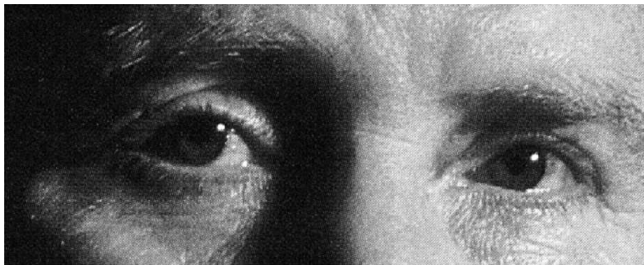

Pensive  
Irritated  
Exited  
Hostile

(25)

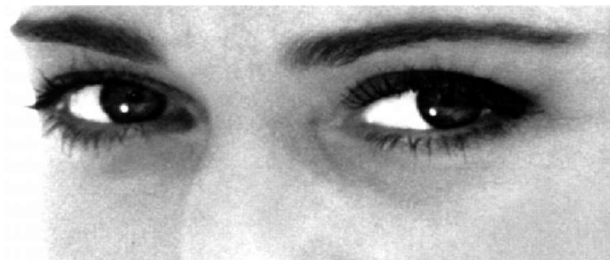

Panicked  
Incredulous  
Despondent  
Interested

(26)

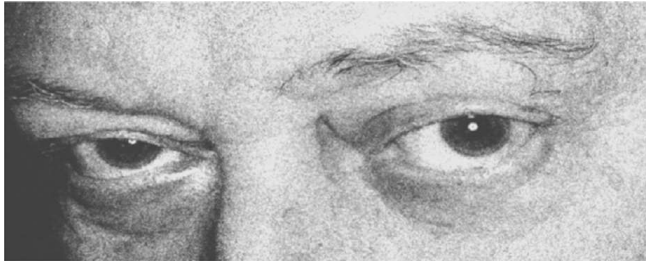

Alarmed  
Shy  
Hostile  
Anxious

(27)

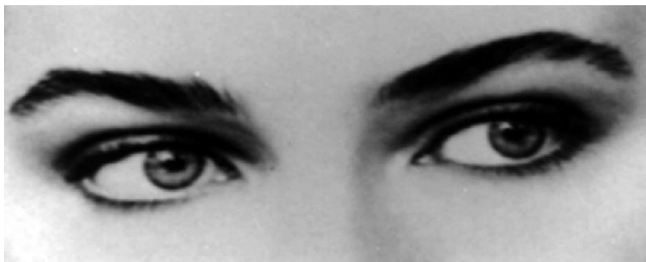

Joking  
Cautious  
Arrogant  
Reassuring

(28)

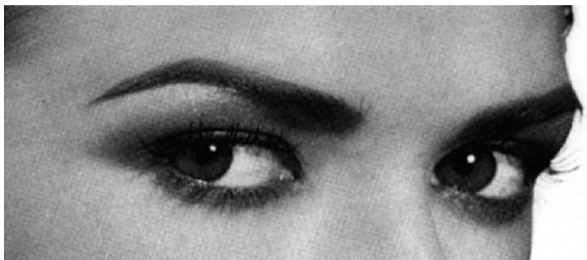

Interested  
Joking  
Affectionate  
Contented

(29)

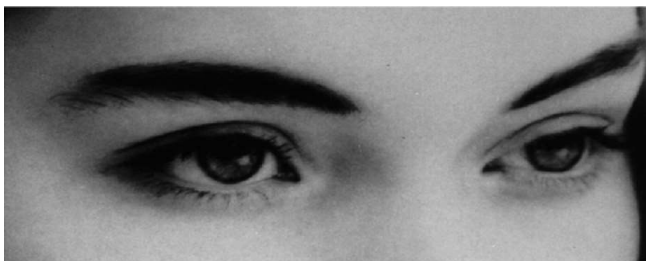

Impatient  
Aghast  
Irritated  
Reflective

(29)

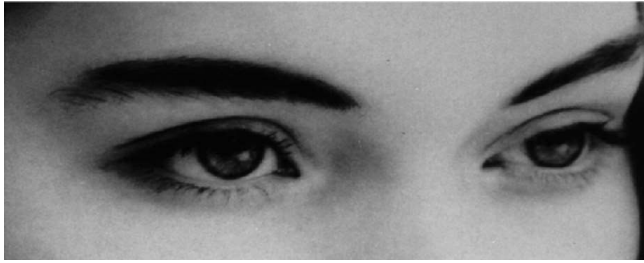

Impatient  
Aghast  
Irritated  
Reflective

(30)

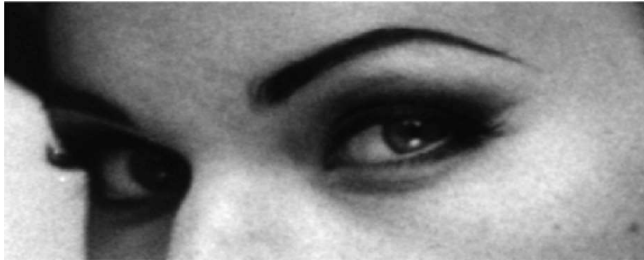

Grateful  
Flirtatious  
Hostile  
Disappointed

(31)

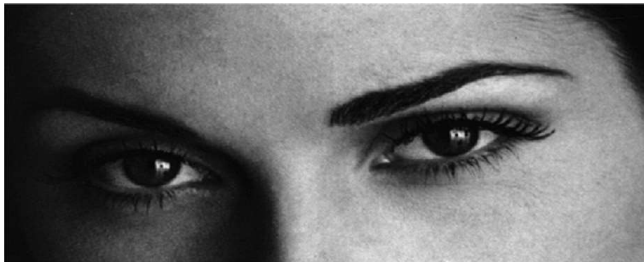

Ashamed  
Confident  
Joking  
Dispirited

(32)

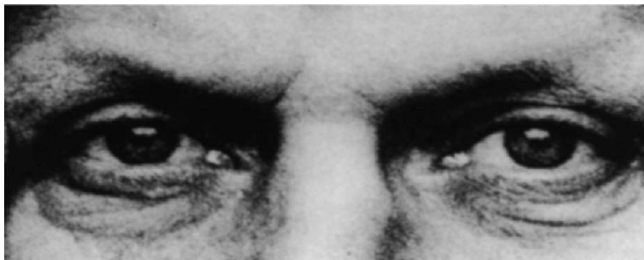

Serious  
Ashamed  
Bewildered  
Alarmed

(33)

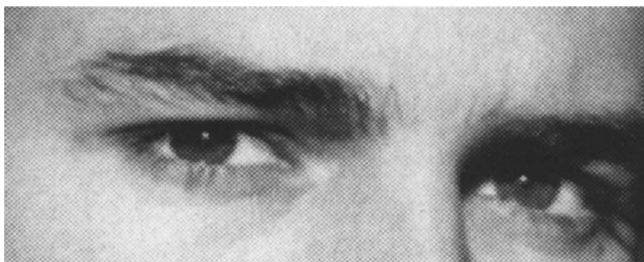

Embarrassed  
Guilty  
Fantasizing  
Concerned



(34)

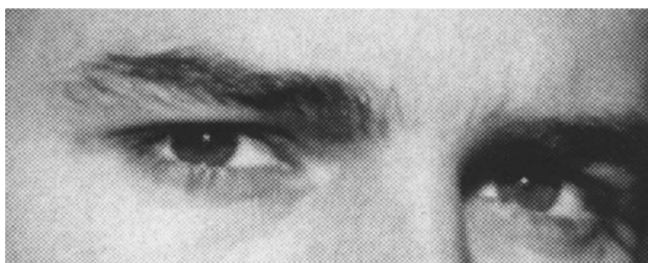

Aghast  
Baffled  
Distrustful  
Terrified

(35)

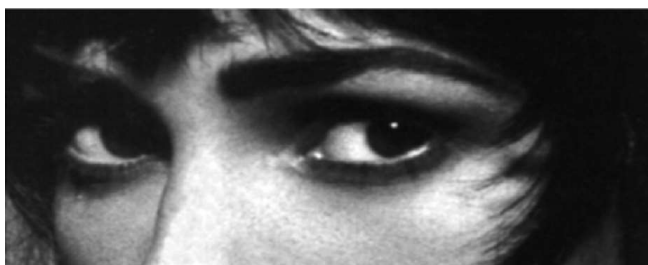

Puzzled  
Nervous  
Insisting  
Contemplative

(36)

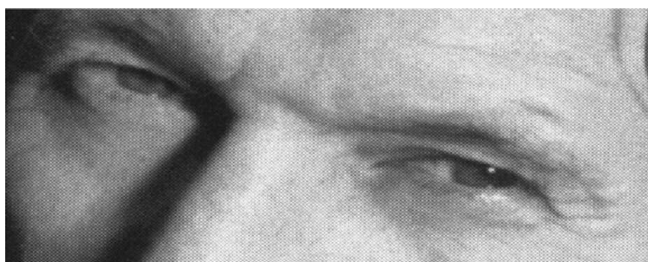

Ashamed  
Nervous  
Suspicious  
Indecisive

## 4.2 Definitions

| WORD DEFINITIONS |                                                                                          |               |                                                                           |
|------------------|------------------------------------------------------------------------------------------|---------------|---------------------------------------------------------------------------|
| ACCUSING         | blaming                                                                                  | BAFFLED       | confused, puzzled, dumbfounded                                            |
|                  | The policeman was accusing the man of stealing a wallet.                                 |               | The detectives were completely baffled by the murder case.                |
| AFFECTIONATE     | showing fondness towards someone                                                         | BEWILDERED    | utterly confused, puzzled, dazed                                          |
|                  | Most mothers are affectionate to their babies by giving them lots of kisses and cuddles. |               | The child was bewildered when visiting the big city for the first time.   |
| AGHAST           | horrified, astonished, alarmed                                                           | CAUTIOUS      | careful, wary                                                             |
|                  | Jane was aghast when she discovered her house had been burgled.                          |               | Sarah was always a bit cautious when talking to someone she did not know. |
| ALARMED          | fearful, worried, filled with anxiety                                                    | COMFORTING    | consoling, compassionate                                                  |
|                  | Claire was alarmed when she thought she was being followed home.                         |               | The nurse was comforting the wounded soldier.                             |
| AMUSED           | finding something funny                                                                  | CONCERNED     | worried, troubled                                                         |
|                  | I was amused by a funny joke someone told me.                                            |               | The doctor was concerned when his patient took a turn for the worse.      |
| ANNOYED          | irritated, displeased                                                                    | CONFIDENT     | self-assured, believing in oneself                                        |
|                  | Jack was annoyed when he found out he had missed the last bus home.                      |               | The tennis player was feeling very confident about winning his match.     |
| ANTICIPATING     | expecting                                                                                | CONFUSED      | puzzled, perplexed                                                        |
|                  | At the start of the football match, the fans were anticipating a quick goal.             |               | Lizzie was so confused by the directions given to her, she got lost.      |
| ANXIOUS          | worried, tense, uneasy                                                                   | CONTEMPLATIVE | reflective, thoughtful, considering                                       |
|                  | The student was feeling anxious before taking her final exams.                           |               | John was in a contemplative mood on the eve of his 60th birthday.         |
| APOLOGETIC       | feeling sorry                                                                            | CONTENTED     | satisfied                                                                 |
|                  | The waiter was very apologetic when he spilt soup all over the customer.                 |               | After a nice walk and a good meal, David felt very contented.             |
| ARROGANT         | conceited, self-important, having a big opinion of oneself                               | CONVINCED     | certain, absolutely positive                                              |
|                  | The arrogant man thought he knew more about politics than everyone else in the room.     |               | Richard was convinced he had come to the right decision.                  |
| ASHAMED          | overcome with shame or guilt                                                             | CURIOUS       | inquisitive, inquiring, prying                                            |
|                  | The boy felt ashamed when his mother discovered him stealing money from her purse.       |               | Louise was curious about the strange shaped parcel.                       |
| ASSERTIVE        | confident, dominant, sure of oneself                                                     | DECIDING      | making your mind up                                                       |
|                  | The assertive woman demanded that the shop give her a refund.                            |               | The man was deciding whom to vote for in the election.                    |
|                  |                                                                                          | DECISIVE      | already made your mind up                                                 |
|                  |                                                                                          |               | Jane looked very decisive as she walked into the polling station.         |

Fig M: Word Definitions—Page 1

|              |                                                                                                                                  |              |                                                                                                                                                                    |
|--------------|----------------------------------------------------------------------------------------------------------------------------------|--------------|--------------------------------------------------------------------------------------------------------------------------------------------------------------------|
| DEFIANT      | insolent, bold, don't care what anyone else thinks<br><br>The animal protester remained defiant even after being sent to prison. | ENCOURAGING  | hopeful, heartening, supporting<br><br>All the parents were encouraging their children in the school sports day.                                                   |
| DEPRESSED    | miserable<br><br>George was depressed when he didn't receive any birthday cards.                                                 | ENTERTAINED  | absorbed and amused or pleased by something<br><br>I was very entertained by the magician.                                                                         |
| DESIRE       | passion, lust, longing for<br><br>Kate had a strong desire for chocolate.                                                        | ENTHUSIASTIC | very eager, keen<br><br>Susan felt very enthusiastic about her new fitness plan.                                                                                   |
| DESPONDENT   | gloomy, despairing, without hope<br><br>Gary was despondent when he did not get the job he wanted.                               | FANTASIZING  | daydreaming<br><br>Emma was fantasizing about being a film star.                                                                                                   |
| DISAPPOINTED | displeased, disgruntled<br><br>Manchester United fans were disappointed not to win the Championship.                             | FASCINATED   | captivated, really interested<br><br>At the seaside, the children were fascinated by the creatures in the rock pools.                                              |
| DISPIRITED   | glum, miserable, low<br><br>Adam was dispirited when he failed his exams.                                                        | FEARFUL      | terrified, worried<br><br>In the dark streets, the women felt fearful.                                                                                             |
| DISTRUSTFUL  | suspicious, doubtful, wary<br><br>The old woman was distrustful of the stranger at her door.                                     | FLIRTATIOUS  | brazen, saucy, teasing, playful<br><br>Connie was accused of being flirtatious when she winked at a stranger at a party.                                           |
| DOMINANT     | commanding, bossy<br><br>The sergeant major looked dominant as he inspected the new recruits.                                    | FLUSTERED    | confused, nervous and upset<br><br>Sarah felt a bit flustered when she realized how late she was for the meeting and that she had forgotten an important document. |
| DOUBTFUL     | dubious, suspicious, not really believing<br><br>Mary was doubtful that her son was telling the truth.                           | FRIENDLY     | sociable, amiable<br><br>The friendly girl showed the tourists the way to the town Centre.                                                                         |
| DUBIOUS      | doubtful, suspicious<br><br>Peter was dubious when offered a surprisingly cheap television in a pub.                             | GRATEFUL     | thankful<br><br>Kelly was very grateful for the kindness shown by the stranger.                                                                                    |
| EAGER        | keen<br><br>On Christmas morning, the children were eager to open their presents.                                                | GUILTY       | feeling sorry for doing something wrong<br><br>Charlie felt guilty about having an affair.                                                                         |
| EARNEST      | having a serious intention<br><br>Harry was very earnest about his religious beliefs.                                            | HATEFUL      | showing intense dislike<br><br>The two sisters were hateful to each other and always fighting.                                                                     |
| EMBARRASSED  | ashamed<br><br>After forgetting a colleague's name, Jenny felt very embarrassed.                                                 | HOPEFUL      | optimistic<br><br>Larry was hopeful that the post would bring good news.                                                                                           |

Fig N: Word Definitions—Page 2

|             |                                                                                                                                                  |             |                                                                                                                                              |
|-------------|--------------------------------------------------------------------------------------------------------------------------------------------------|-------------|----------------------------------------------------------------------------------------------------------------------------------------------|
| HORRIFIED   | terrified, appalled<br><br>The man was horrified to discover that his new wife was already married.                                              | JEALOUS     | envious<br><br>Tony was jealous of all the taller, better-looking boys in his class.                                                         |
| HOSTILE     | unfriendly<br><br>The two neighbors were hostile towards each other because of an argument about loud music.                                     | JOKING      | being funny, playful<br><br>Gary was always joking with his friends.                                                                         |
| IMPATIENT   | restless, wanting something to happen soon<br><br>Jane grew increasingly impatient as she waited for her friend who was already 20 minutes late. | NERVOUS     | apprehensive, tense, worried<br><br>Just before her job interview, Alice felt very nervous.                                                  |
| IMPLORING   | begging, pleading<br><br>Nicola looked imploring as she tried to persuade her dad to lend her the car.                                           | OFFENDED    | insulted, wounded, having hurt feelings<br><br>When someone made a joke about her weight, Martha felt very offended.                         |
| INCRECULOUS | not believing<br><br>Simon was incredulous when he heard that he had won the lottery.                                                            | PANICKED    | distraught, feeling of terror or anxiety<br><br>On waking to find the house on fire, the whole family was panicked.                          |
| INDECISIVE  | unsure, hesitant, unable to make your mind up<br><br>Tammy was so indecisive that she couldn't even decide what to have for lunch.               | PENSIVE     | thinking about something slightly worrying<br><br>Susie looked pensive on the way to meeting her boyfriend's parents for the first time.     |
| INDIFFERENT | disinterested, unresponsive, don't care<br><br>Terry was completely indifferent as to whether they went to the cinema or the pub.                | PERPLEXED   | bewildered, puzzled, confused<br><br>Frank was perplexed by the disappearance of his garden gnomes.                                          |
| INSISTING   | demanding, persisting, maintaining<br><br>After a work outing, Frank was insisting he paid the bill for everyone.                                | PLAYFUL     | full of high spirits and fun<br><br>Neil was feeling playful at his birthday party.                                                          |
| INSULTING   | rude, offensive<br><br>The football crowd was insulting the referee after he gave a penalty.                                                     | PREOCCUPIED | absorbed, engrossed in one's own thoughts<br><br>Worrying about her mother's illness made Debbie preoccupied at work                         |
| INTERESTED  | inquiring, curious<br><br>After seeing Jurassic Park, Hugh grew very interested in dinosaurs.                                                    | PUZZLED     | perplexed, bewildered, confused<br><br>After doing the crossword for an hour, June was still puzzled by one clue.                            |
| INTRIGUED   | very curious, very interested<br><br>A mystery phone call intrigued Zoe.                                                                         | REASSURING  | supporting, encouraging, giving someone confidence<br><br>Andy tried to look reassuring as he told his wife that her new dress did suit her. |
| IRRITATED   | exasperated, annoyed<br><br>Frances was irritated by all the junk mail she received.                                                             | REFLECTIVE  | contemplative, thoughtful<br><br>George was in a reflective mood as he thought about what he'd done with his life.                           |
|             |                                                                                                                                                  | REGRETFUL   | sorry<br><br>Lee was always regretful that he had never travelled when he was younger.                                                       |

Fig O: Word Definitions—Page 3

|             |                                                                                                                                               |             |                                                                                                                                |
|-------------|-----------------------------------------------------------------------------------------------------------------------------------------------|-------------|--------------------------------------------------------------------------------------------------------------------------------|
| RELAXED     | taking it easy, calm, carefree<br>On holiday, Pam felt happy and relaxed.                                                                     | THREATENING | menacing, intimidating<br>The large, drunken man was acting in a very threatening way.                                         |
| RELIEVED    | freed from worry or anxiety<br>At the restaurant, Ray was relieved to find that he had not forgotten his wallet.                              | UNEASY      | unsettled, apprehensive, troubled<br>Karen felt slightly uneasy about accepting a lift from the man she had only met that day. |
| RESENTFUL   | bitter, hostile<br>The businessman felt very resentful towards his younger colleague who had been promoted above him.                         | UPSET       | agitated, worried, uneasy<br>The man was very upset when his mother died.                                                      |
| SARCASTIC   | cynical, mocking, scornful<br>The comedian made a sarcastic comment when someone came into the theatre late.                                  | WORRIED     | anxious, fretful, troubled<br>When her cat went missing, the girl was very worried.                                            |
| SATISFIED   | content, fulfilled<br>Steve felt very satisfied after he had got his new flat just how he wanted it.                                          |             |                                                                                                                                |
| SKEPTICAL   | doubtful, suspicious, mistrusting<br>Patrick looked skeptical as someone read out his horoscope to him.                                       |             |                                                                                                                                |
| SERIOUS     | solemn, grave<br>The bank manager looked serious as he refused Nigel an overdraft.                                                            |             |                                                                                                                                |
| STERN       | severe, strict, firm<br>The teacher looked very stern as he told the class off.                                                               |             |                                                                                                                                |
| SUSPICIOUS  | disbelieving, suspecting, doubting<br>After Sam had lost his wallet for the second time at work, he grew suspicious of one of his colleagues. |             |                                                                                                                                |
| SYMPATHETIC | kind, compassionate<br>The nurse looked sympathetic as she told the patient the bad news.                                                     |             |                                                                                                                                |
| TENTATIVE   | hesitant, uncertain, cautious<br>Andrew felt a bit tentative as he went into the room full of strangers.                                      |             |                                                                                                                                |
| TERRIFIED   | alarmed, fearful<br>The boy was terrified when he thought he saw a ghost.                                                                     |             |                                                                                                                                |
| THOUGHTFUL  | thinking about something<br>Phil looked thoughtful as he sat waiting for the girlfriend he was about to finish with.                          |             |                                                                                                                                |

Fig P: Word Definitions—Page 4

### 4.3 Answers

Table A: RMET Answers

| Question | Answer        | Question | Answer      |
|----------|---------------|----------|-------------|
| (1)      | Playful       | (19)     | Tentative   |
| (2)      | Upset         | (20)     | Friendly    |
| (3)      | Desire        | (21)     | Fantasizing |
| (4)      | Insisting     | (22)     | Preoccupied |
| (5)      | Worried       | (23)     | Defiant     |
| (6)      | Fantasizing   | (24)     | Pensive     |
| (7)      | Uneasy        | (25)     | Interested  |
| (8)      | Despondent    | (26)     | Hostile     |
| (9)      | Preoccupied   | (27)     | Cautious    |
| (10)     | Cautious      | (28)     | Interested  |
| (11)     | Regretful     | (29)     | Reflective  |
| (12)     | Skeptical     | (30)     | Flirtatious |
| (13)     | Anticipating  | (31)     | Confident   |
| (14)     | Accusing      | (32)     | Serious     |
| (15)     | Contemplative | (33)     | Concerned   |
| (16)     | Thoughtful    | (34)     | Distrustful |
| (17)     | Doubtful      | (35)     | Nervous     |
| (18)     | Decisive      | (36)     | Suspicious  |

Although not included in the analysis the answer for the practice question is Panicked.

## 5 Descriptive Statistics and Hypothesis Tests

Fig 2, from the main article, presents the histogram of RMET scores by treatment and gender. No significant gender difference was found between the variances in the Baseline (Variance ratio test ,  $f=1.26$ ,  $p=0.52$ ) and Individual (Variance ratio test,  $f=1.40$ ,  $p=0.38$ ) conditions. In the Winner-take-all condition, the variance for females is statistically larger than the variance for males at the 10% level (Variance ratio test,  $f=0.53$ ,  $p=0.09$ ). In the Charity condition, the variance for male RMET scores was significantly larger than the variance for females (Variance ratio test,  $f=3.56$ ,  $p=0.00$ ).

For each variable used in the data analysis, Table B provides a description and how

Table B: Description of Variables

|                                | Overall                                                                                 |
|--------------------------------|-----------------------------------------------------------------------------------------|
| RMET Score                     | Sum of correct answers in RMET test out of 36.                                          |
| Correct Answer                 | Dummy variable equal to one if subject answered RMET question correctly.                |
| Female                         | Dummy variable equal to one if female.                                                  |
| Male                           | Dummy variable equal to one if male.                                                    |
| Age                            | Equal to the age of subject.                                                            |
| Number of Years Living in U.S. | Equal to the number of years lived in the U.S.                                          |
| Native English Speaker         | Equal to one if the subject is a native English speaker.                                |
| Cognitive Reflection Test      | Equal to the sum of correct answers in the Cognitive Reflection Test.                   |
| Number of Economics Classes    | Equal to the number of economics courses taken.                                         |
| Number of Statistics Classes   | Equal to the number of statistics courses taken.                                        |
| Average Question Time          | Equal to the average time taken for each question by a given subject.                   |
| Individual                     | Dummy variable equal to one if subject was in the Individual condition.                 |
| Winner-take-all                | Dummy variable equal to one if subject was in the Winner-take-all condition.            |
| Charity                        | Dummy variable equal to one if subject was in the Charity condition.                    |
| Individual x female            | Dummy variable equal to one if subject was in the Individual condition and female.      |
| Individual x male              | Dummy variable equal to one if subject was in the Individual condition and male.        |
| Winner-take-all x female       | Dummy variable equal to one if subject was in the Winner-take-all condition and female. |
| Winner-take-all x male         | Dummy variable equal to one if subject was in the Winner-take-all condition and male.   |
| Charity x female               | Dummy variable equal to one if subject was in the Charity condition and female.         |
| Charity x male                 | Dummy variable equal to one if subject was in the Charity condition and male.           |

Table C: Summary Statistics

|                                | Overall | Baseline | Individual | Winner-take-all | Charity |
|--------------------------------|---------|----------|------------|-----------------|---------|
| RMET Score                     | 27.45   | 27.61    | 27.31      | 27.09           | 27.87   |
| Female (Count)                 | 144     | 41       | 40         | 37              | 26      |
| Male (Count)                   | 94      | 23       | 18         | 27              | 26      |
| Age                            | 20.13   | 19.77    | 20.09      | 20.19           | 20.56   |
| Age (Minimum)                  | 18      | 18       | 18         | 18              | 28      |
| Age (Max)                      | 30      | 23       | 28         | 28              | 30      |
| Number of Years Living in U.S. | 16.74   | 16.41    | 17.62      | 15.58           | 17.62   |
| Native English Speaker         | 0.48    | 0.42     | 0.62       | 0.45            | 0.44    |
| Cognitive Reflection Test      | 1.09    | 1.11     | 1.12       | 1.11            | 1.00    |
| Number of Economics Classes    | 1.32    | 1.63     | 1.21       | 0.97            | 1.50    |
| Number of Statistics Classes   | 1.04    | 1.06     | 1.03       | 0.89            | 1.19    |
| Average Question Time          | 12.85   | 12.06    | 12.67      | 12.96           | 13.87   |
| Money Earned from RMET         | 7.79    | 0        | 10.92      | 10.00           | 11.15*  |
| Money Donated to Charity       | 2.44*   | 0        | 0          | 0               | 11.15*  |
| Take Home Pay                  | 12.35   | 7        | 17.92      | 17              | 7       |
| Observations                   | 238     | 64       | 58         | 64              | 52      |

All statistics are averages unless otherwise noted. \*Money was donated to subjects selected charity.

the variable was coded. Table C gives the summary statistics of the variables used in both the main paper and the supplementary appendix. On average 61% of subjects were female and the average age was approximately 20 years old. Scores on the cognitive reflection test were coded to be equal to the sum of the correct answers. The Cronbach alpha for the three questions on the cognitive reflection test was 0.70. Overall, subjects received a \$7 show up payment, and on average earned \$7.79 on the RMET task. The average time spent by subjects across the treatments was similar. Compared to the Baseline no significance difference in average time spent on the questions was found for the Individual condition (Wilcoxon rank sum test,  $z=-1.164$ ,  $p=0.2445$ ) or the Winner-take-all condition (Wilcoxon rank sum test,  $z=-1.425$ ,  $p=0.1542$ ). Subjects took longer on average in the Charity condition compared to the Baseline, this difference is statistically significant (Wilcoxon rank sum test,  $z=3.026$ ,  $p=0.003$ ).

The average time that subjects took to answer questions is negatively correlated with RMET scores. As a result, it is important to understand if the gender difference we observe



in the treatments is driven by changes in the length of time individuals take to answer each question. Table D presents regression results examining how both the treatments and gender influenced the average time taken for a given RMET question. The first column shows that the Charity condition was associated with a statistically significant increase in the time taken, but neither the Individual nor Winner-take-all conditions statistically differed from the Baseline condition. Column 2 interacts the conditions with a dummy variable for female. It appears, that females took significantly longer on the Charity condition relative to the Baseline but no significant interaction was found in the Individual or Winner-take-all conditions. As a result, it appears that changes in the time taken are unable to explain the gender differences that occur in the Individual and Winner-take-all conditions.

In the main paper, Fig 1 (A) presents the pooled results across the different conditions. No significant difference in RMET scores occurs between the Baseline condition and the Individual condition (Wilcoxon rank sum test,  $z=-0.773$ ,  $p=0.440$ ). Similarly, no significant difference was found in the Winner-take-all condition (Wilcoxon rank sum test,  $z=-0.469$ ,  $p=0.639$ ) or the Charity condition (Wilcoxon rank sum test,  $z=0.385$ ,  $p=0.700$ ) relative to the Baseline condition. For Fig 1 (B) in the main paper, there was a statistically significant decrease in RMET scores for females in the Individual condition (Wilcoxon rank sum,  $z=-1.814$ ,  $p=0.070$ ) and the Winner-take-all condition (Wilcoxon rank sum,  $z=-1.894$ ,  $p=0.058$ ) relative to the Baseline condition. No significant difference for females occurred in the Charity condition compared to the Baseline condition (Wilcoxon rank sum test,  $z=0.136$ ,  $p=0.892$ ). For male RMET scores, the Individual condition (Wilcoxon rank sum test,  $z=0.912$ ,  $p=0.362$ ) and the Charity condition (Wilcoxon rank sum test,  $z=0.836$ ,  $p=0.403$ ) are not significantly different compared to the Baseline condition. In the Winner-take-all condition male RMET scores were higher on average compared to the Baseline condition, this difference is significant at the 11% level (Wilcoxon rank sum test,  $z=1.614$ ,  $p=0.107$ ). These non-parametric tests are preformed on the data not controlling for additional factors that may influence individual RMET. The next section presents regression results that accounts for additional covariates

Table D: Average Question Time Taken on RMET by Treatment and Demographics

|                           | (1)<br>Average Question<br>Time | (2)<br>Average Question<br>Time |
|---------------------------|---------------------------------|---------------------------------|
| Charity                   | 1.75***<br>(0.61)               | 0.20<br>(1.10)                  |
| Individual                | 0.96<br>(0.59)                  | 0.33<br>(1.10)                  |
| Winner-take-all           | 0.77<br>(0.71)                  | -0.60<br>(1.20)                 |
| Female                    | -1.02**<br>(0.49)               | -2.54**<br>(1.08)               |
| Native English Speaker    | -0.85*<br>(0.47)                | -1.03**<br>(0.48)               |
| Years living in U.S.      | -0.11**<br>(0.05)               | -0.10**<br>(0.05)               |
| Cognitive Reflection Test | -0.57***<br>(0.21)              | -0.62***<br>(0.21)              |
| Charity x Female          |                                 | 2.65**<br>(1.34)                |
| Individual x Female       |                                 | 1.06<br>(1.32)                  |
| Winner-take-all x Female  |                                 | 2.22<br>(1.48)                  |
| Intercept                 | 15.46***<br>(1.09)              | 16.46***<br>(1.33)              |
| $N$                       | 238                             | 238                             |
| $R^2$                     | 0.123                           | 0.141                           |

Regressions are ordinary least squares (OLS). Clustered standard errors at the subject level are in parentheses

\*  $p < 0.10$ , \*\*  $p < 0.05$ , \*\*\*  $p < 0.01$

that impact RMET giving more precise estimates of the relationship between the experiment conditions and RMET.

## 6 Regression Analysis and Robustness Checks

In this section, we present more detailed regression analysis from the main paper and present additional robust checks. Table E presents a more detailed analysis of the ordinary least squares regressions in Table 2 from the main paper. Column (3) and column (4) are the regressions in column (A) and (B) from Table 2 in the main paper, but include the coefficients for the control variables. Gender, whether English is the subject’s first language, the number of years the subject has lived in the U.S, and cognitive ability are all positive and statistically significant factors in RMET score. In addition, average question time is negatively correlated with RMET score suggesting that people who took longer to answer the question were more likely to choose the incorrect answer. These four variables are listed as controls in the regression results. For column (A), we reject the joint hypothesis that these four variables are equal to zero (F-test,  $F(4,237)=13.94$ ,  $p=0.00$ ). Similar results are found for column (B) (F-test,  $F(4,237)=15.32$ ). Similarly Table F presents the same regressions as Table E but interacts a dummy variable for female with the experimental conditions. These tables are both equivalent, but we presented the regressions in Table E in the main paper for clarity. Table G uses the same regressions as Table E but uses heteroskedastically robust standard errors. There is essentially no difference in the results between the two error assumptions.

Table H presents random effects probit regressions on the probability that a subject answers a given RMET question correctly. Columns (2) and (4) were used to calculate the change in predicted probability that is presented in columns (C) and (D) of Table 2 in the main paper. The regressions in columns (C) and (D) include control variables, subject specific effects, and question fixed effects. For the control variables in column (2), using a

Table E: Predicting RMET Score Pure Gender Effect by Treatment and Demographics

|                           | (1)<br>RMET Score  | (2)<br>RMET Score  | (3)<br>RMET Score  | (4)<br>RMET Score  |
|---------------------------|--------------------|--------------------|--------------------|--------------------|
| Charity                   | 0.26<br>(0.65)     | 0.17<br>(0.61)     | 0.68<br>(0.57)     |                    |
| Individual                | -0.30<br>(0.59)    | -0.78<br>(0.56)    | -0.57<br>(0.56)    |                    |
| Winner-take-all           | -0.52<br>(0.70)    | -0.39<br>(0.63)    | -0.18<br>(0.61)    |                    |
| Female                    |                    | 0.81*<br>(0.46)    | 1.03**<br>(0.45)   | 2.87***<br>(0.83)  |
| Native English Speaker    |                    | 1.32***<br>(0.47)  | 0.99**<br>(0.44)   | 1.01**<br>(0.44)   |
| Years living in U.S.      |                    | 0.14***<br>(0.05)  | 0.13**<br>(0.05)   | 0.13***<br>(0.05)  |
| Average Question Time     |                    |                    | -0.22***<br>(0.07) | -0.20***<br>(0.07) |
| Cognitive Reflection Test |                    |                    | 0.50**<br>(0.20)   | 0.53***<br>(0.20)  |
| Charity x Female          |                    |                    |                    | 0.33<br>(0.66)     |
| Charity x Male            |                    |                    |                    | 1.48<br>(0.95)     |
| Individual x Female       |                    |                    |                    | -1.42**<br>(0.66)  |
| Individual x Male         |                    |                    |                    | 0.95<br>(1.04)     |
| Competition x Female      |                    |                    |                    | -1.62**<br>(0.82)  |
| Competition x Male        |                    |                    |                    | 2.03**<br>(0.91)   |
| Intercept                 | 27.61***<br>(0.44) | 24.18***<br>(0.91) | 26.52***<br>(1.56) | 25.04***<br>(1.73) |
| <i>N</i>                  | 238                | 238                | 238                | 238                |
| <i>R</i> <sup>2</sup>     | 0.006              | 0.135              | 0.212              | 0.248              |

Regressions are ordinary least squares (OLS). Clustered standard errors at the subject level are in parentheses

\*  $p < 0.10$ , \*\*  $p < 0.05$ , \*\*\*  $p < 0.01$

Table F: Predicting RMET Score with Gender Interactions by Treatment and Demographics

|                           | (1)                | (2)                | (3)                | (4)                |
|---------------------------|--------------------|--------------------|--------------------|--------------------|
|                           | RMET Score         | RMET Score         | RMET Score         | RMET Score         |
| Charity                   | 0.26<br>(0.65)     | 0.17<br>(0.61)     | 0.68<br>(0.57)     | 1.48<br>(0.95)     |
| Individual                | -0.30<br>(0.59)    | -0.78<br>(0.56)    | -0.57<br>(0.56)    | 0.95<br>(1.04)     |
| Winner-take-all           | -0.52<br>(0.70)    | -0.39<br>(0.63)    | -0.18<br>(0.61)    | 2.03**<br>(0.91)   |
| Female                    |                    | 0.81*<br>(0.46)    | 1.03**<br>(0.45)   | 2.87***<br>(0.83)  |
| Native English Speaker    |                    | 1.32***<br>(0.47)  | 0.99**<br>(0.44)   | 1.01**<br>(0.44)   |
| Years living in U.S.      |                    | 0.14***<br>(0.05)  | 0.13**<br>(0.05)   | 0.13***<br>(0.05)  |
| Average Question Time     |                    |                    | -0.22***<br>(0.07) | -0.20***<br>(0.07) |
| Cognitive Reflection Test |                    |                    | 0.50**<br>(0.20)   | 0.53***<br>(0.20)  |
| Charity x Female          |                    |                    |                    | -1.15<br>(1.16)    |
| Individual x Female       |                    |                    |                    | -2.37*<br>(1.23)   |
| Winner-take-all x Female  |                    |                    |                    | -3.65***<br>(1.26) |
| Intercept                 | 27.61***<br>(0.44) | 24.18***<br>(0.91) | 26.52***<br>(1.56) | 25.04***<br>(1.73) |
| <i>N</i>                  | 238                | 238                | 238                | 238                |

Regressions are ordinary least squares (OLS). Clusterd standard errors at the subject level are in parentheses

\*  $p < 0.10$ , \*\*  $p < 0.05$ , \*\*\*  $p < 0.01$

Table G: Predicting RMET Score by Treatment and Demographics with Robust Standard Errors

|                           | (1)                | (2)                | (3)                | (4)                |
|---------------------------|--------------------|--------------------|--------------------|--------------------|
|                           | RMET Score         | RMET Score         | RMET Score         | RMET Score         |
| Charity                   | 0.26<br>(0.65)     | 0.17<br>(0.61)     | 0.68<br>(0.57)     |                    |
| Individual                | -0.30<br>(0.59)    | -0.78<br>(0.56)    | -0.57<br>(0.56)    |                    |
| Winner-take-all           | -0.52<br>(0.70)    | -0.39<br>(0.63)    | -0.18<br>(0.61)    |                    |
| Female                    |                    | 0.81*<br>(0.46)    | 1.03**<br>(0.45)   | 2.87***<br>(0.83)  |
| Native English Speaker    |                    | 1.32***<br>(0.47)  | 0.99**<br>(0.44)   | 1.01**<br>(0.44)   |
| Years living in U.S.      |                    | 0.14***<br>(0.05)  | 0.13**<br>(0.05)   | 0.13***<br>(0.05)  |
| Average Question Time     |                    |                    | -0.22***<br>(0.07) | -0.20***<br>(0.07) |
| Cognitive Reflection Test |                    |                    | 0.50**<br>(0.20)   | 0.53***<br>(0.20)  |
| Charity x Female          |                    |                    |                    | 0.33<br>(0.66)     |
| Charity x Male            |                    |                    |                    | 1.48<br>(0.95)     |
| Individual x Female       |                    |                    |                    | -1.42**<br>(0.66)  |
| Individual x Male         |                    |                    |                    | 0.95<br>(1.04)     |
| Winner-take-all x Female  |                    |                    |                    | -1.62**<br>(0.82)  |
| Winner-take-all x Male    |                    |                    |                    | 2.03**<br>(0.91)   |
| Intercept                 | 27.61***<br>(0.44) | 24.18***<br>(0.91) | 26.52***<br>(1.56) | 25.04***<br>(1.73) |
| $N$                       | 238                | 238                | 238                | 238                |
| $R^2$                     | 0.006              | 0.135              | 0.212              | 0.248              |

Regressions are ordinary least squares (OLS). Robust standard errors in parentheses

\*  $p < 0.10$ , \*\*  $p < 0.05$ , \*\*\*  $p < 0.01$

chi-squared test we reject the joint hypothesis that the control variables for Native English Speaker, Average Question Time, Cognitive Reflection Test, and Number of Years Lived in the U.S. are jointly equal to zero (Chi-squared Test,  $\chi^4=59.92$ ,  $p=0.00$ ). Similar results are found for column (4) (Chi-squared Test,  $\chi^4=60.97$ ,  $p=0.00$ ). The subject specific effect is a random factor and we reject that this factor is equal to zero for column (2) (Chi-squared Test,  $\chi^1=44.36$ ,  $p=0.00$ ) and column (4) (Chi-squared Test,  $\chi^1=36.66$ ,  $p=0.00$ ). The question fixed effects allow us to control for any specific questions that may influence the probability of a subject answering a question correctly. We can reject the hypothesis that the coefficients for the question dummy variables are jointly equal to zero for column (2) (Chi-squared Test,  $\chi^{31}=638.72$ ,  $p=0.00$ ) and column (4) (Chi-squared Test,  $\chi^{31}=638.56$ ,  $p=0.00$ ).

There is issue in interpretation of the interaction terms in non-linear models when interested in marginal effects [80, 81]. To deal with this issue, we followed ([81]) and exploited the fact that our interaction terms were dummy variables. Using the regression results from columns (2) and (4), we calculated the change in predicted probability for each case relative to the Baseline condition, and used the delta method to calculate the standard errors. The results are presented in Table I.

Table H: Predicting Probability of Correct Answer in RMET: Treatment and Gender Interactions

|                                      | (1)<br>Correct<br>Answer | (2)<br>Correct<br>Answer | (3)<br>Correct<br>Answer | (4)<br>Correct<br>Answer |
|--------------------------------------|--------------------------|--------------------------|--------------------------|--------------------------|
| Charity                              | 0.02<br>(0.06)           | 0.07<br>(0.06)           | 0.14*<br>(0.08)          | 0.15*<br>(0.09)          |
| Individual                           | -0.03<br>(0.06)          | -0.06<br>(0.06)          | 0.08<br>(0.09)           | 0.09<br>(0.10)           |
| Winner-take-all                      | -0.04<br>(0.06)          | -0.01<br>(0.06)          | 0.18**<br>(0.08)         | 0.20**<br>(0.09)         |
| Female                               |                          | 0.10**<br>(0.05)         | 0.26***<br>(0.08)        | 0.29***<br>(0.09)        |
| Native English Speaker               |                          | 0.11**<br>(0.05)         | 0.09**<br>(0.04)         | 0.11**<br>(0.05)         |
| Years living in U.S.                 |                          | 0.01***<br>(0.00)        | 0.01***<br>(0.00)        | 0.01***<br>(0.00)        |
| Average Question Time                |                          | -0.02***<br>(0.01)       | -0.02***<br>(0.01)       | -0.02***<br>(0.01)       |
| Cognitive Reflection Test            |                          | 0.05***<br>(0.02)        | 0.05***<br>(0.02)        | 0.05***<br>(0.02)        |
| Individual X Female                  |                          |                          | -0.21*<br>(0.11)         | -0.24**<br>(0.12)        |
| Charity X Female                     |                          |                          | -0.11<br>(0.11)          | -0.12<br>(0.12)          |
| Winner-take-all X Female             |                          |                          | -0.32***<br>(0.10)       | -0.35***<br>(0.11)       |
| Intercept                            | 0.75***<br>(0.04)        | -0.22<br>(0.15)          | 0.52***<br>(0.12)        | -0.37**<br>(0.16)        |
| Individual Question<br>Fixed Effects | No                       | Yes                      | No                       | Yes                      |
| $N$                                  | 8568                     | 8568                     | 8568                     | 8568                     |
| $\rho$                               | 0.05                     | 0.04                     | 0.03                     | 0.04                     |
| $\chi^2$                             | 1.45                     | 745.21                   | 77.10                    | 754.90                   |

Regressions are random effects probit with standard errors in parentheses.

\*  $p < 0.10$ , \*\*  $p < 0.05$ , \*\*\*  $p < 0.01$



Table I: Change in Predicted Probability of Correct Answer in RMET Relative to Baseline

|        | <u>Individual</u>                     |                   | <u>Winner-take-all</u>                |                   | <u>Charity</u>                        |                   |
|--------|---------------------------------------|-------------------|---------------------------------------|-------------------|---------------------------------------|-------------------|
|        | Change in<br>Predicted<br>Probability | Standard<br>Error | Change in<br>Predicted<br>Probability | Standard<br>Error | Change in<br>Predicted<br>Probability | Standard<br>Error |
| Female | -0.04**                               | (0.02)            | -0.04**                               | (0.02)            | 0.01                                  | (0.02)            |
|        | 95% CI [-0.08,-0.00]                  |                   | 95% CI [-0.08,-0.00]                  |                   | 95% CI [-0.04,0.05]                   |                   |
| Male   | -0.03                                 | (0.03)            | 0.06**                                | (0.02)            | 0.04*                                 | (0.02)            |
|        | 95% CI [-0.03,0.08]                   |                   | 95% CI [0.01,0.10]                    |                   | 95% CI [-0.01,0.09]                   |                   |

Predicted probabilities are derived from the random effects probit regression from Table S6 column 4.

Standard errors are calculated using the delta method and are reported in parentheses.

Confidence intervals at the 95% level are reported in brackets.

\*  $p < 0.10$ , \*\*  $p < 0.05$ , \*\*\*  $p < 0.01$

## References

- [79] Fischbacher U. z-Tree: Zurich toolbox for ready-made economic experiments. Exp. Econ. 2007; 19: 171-178.
- [80] Ai C, Norton EC. Interaction terms in logit and probit models. Econ. Lett. 2003; 80: 123-129.
- [81] Buis ML. Stata tip 87: Interpretation of interactions in nonlinear models. Stata J. 2010; 10: 305-308.
